# Supplementary material for: Exploring the Effects of Short-Term Daily Intake of Nitraria retusa Tea on Lipid Profile: A Pre-Post, Uncontrolled Pilot Study in Both Healthy and Overweight/Obese Adults
Source: MDPI journal article supplement (doi:10.3390/nu15163649), 2023-08-20
Supplement: s1 [file s1]

## Supplementary Data

**Supplementary Table S1:** Lipid profile in high-dose group of overweight/obese participants with BMI  $\leq 29.9$  (n = 10)

|                    | <b>Before</b> | <b>After</b> | <b><i>p</i> value<sup>a</sup></b> |
|--------------------|---------------|--------------|-----------------------------------|
| <b>TC, mmol/L</b>  | 4.78          | 4.92         | 0.19                              |
| <b>TG, mmol/L</b>  | 1.23          | 1.20         | 0.41                              |
| <b>HDL, mmol/L</b> | 1.21          | 1.30         | 0.051                             |
| <b>LDL, mmol/L</b> | 3.01          | 3.07         | 0.28                              |

<sup>a</sup>Within-group differences in the parameters before and after intervention were compared using paired t-test (parametric)

**Supplementary Table S2:** Lipid profile in high-dose group of overweight/obese participants with BMI  $\geq 30.0$  (n = 22)

|                    | <b>Before</b> | <b>After</b> | <b><i>p</i> value<sup>a</sup></b> |
|--------------------|---------------|--------------|-----------------------------------|
| <b>TC, mmol/L</b>  | 5.21          | 5.19         | 0.44                              |
| <b>TG, mmol/L</b>  | 1.41          | 1.23         | 0.006                             |
| <b>HDL, mmol/L</b> | 1.28          | 1.43         | < 0.001                           |
| <b>LDL, mmol/L</b> | 3.33          | 3.19         | 0.11                              |

<sup>a</sup>Within-group differences in the parameters before and after intervention were compared using paired t-test (parametric)

**Supplementary Table S3:** Lipid profile in high-dose group of overweight/obese participants with age < 40 yrs (n = 13)

|                    | <b>Before</b> | <b>After</b> | <b><i>p</i> value<sup>a</sup></b> |
|--------------------|---------------|--------------|-----------------------------------|
| <b>TC, mmol/L</b>  | 4.72          | 4.81         | 0.23                              |
| <b>TG, mmol/L</b>  | 1.24          | 1.03         | 0.011                             |
| <b>HDL, mmol/L</b> | 1.14          | 1.26         | 0.005                             |
| <b>LDL, mmol/L</b> | 3.08          | 3.07         | 0.49                              |

<sup>a</sup>Within-group differences in the parameters before and after intervention were compared using paired t-test (parametric)

**Supplementary Table S4:** Lipid profile in high-dose group of overweight/obese participants with age > 40 yrs (n = 19)

|                    | <b>Before</b> | <b>After</b> | <b><i>p</i> value<sup>a</sup></b> |
|--------------------|---------------|--------------|-----------------------------------|
| <b>TC, mmol/L</b>  | 5.32          | 5.32         | 0.48                              |
| <b>TG, mmol/L</b>  | 1.43          | 1.36         | 0.22                              |
| <b>HDL, mmol/L</b> | 1.34          | 1.47         | 0.001                             |
| <b>LDL, mmol/L</b> | 3.33          | 3.21         | 0.102                             |

<sup>a</sup>Within-group differences in the parameters before and after intervention were compared using paired t-test (parametric)

**Supplementary Table S5:** Lipid profile in high-dose group of overweight/obese participants with age < 40 yrs, BMI  $\leq$  29.9 (n = 7)

|                    | <b>Before</b> | <b>After</b> | <b><i>p</i> value<sup>a</sup></b> |
|--------------------|---------------|--------------|-----------------------------------|
| <b>TC, mmol/L</b>  | 4.67          | 4.78         | 0.22                              |
| <b>TG, mmol/L</b>  | 1.04          | 0.92         | 0.025                             |
| <b>HDL, mmol/L</b> | 1.24          | 1.32         | 0.11                              |
| <b>LDL, mmol/L</b> | 2.94          | 3.03         | 0.25                              |

<sup>a</sup>Within-group differences in the parameters before and after intervention were compared using paired t-test (parametric)

**Supplementary Table S6:** Lipid profile in high-dose group of overweight/obese participants with age < 40 yrs, BMI  $\geq$  30.0 (n = 6)

|                    | <b>Before</b> | <b>After</b> | <b><i>p</i> value<sup>a</sup></b> |
|--------------------|---------------|--------------|-----------------------------------|
| <b>TC, mmol/L</b>  | 4.79          | 4.84         | 0.39                              |
| <b>TG, mmol/L</b>  | 1.47          | 1.16         | 0.054                             |
| <b>HDL, mmol/L</b> | 1.03          | 1.196        | 0.006                             |
| <b>LDL, mmol/L</b> | 3.23          | 3.12         | 0.36                              |

<sup>a</sup>Within-group differences in the parameters before and after intervention were compared using paired t-test (parametric)

**Supplementary Table S7:** Lipid profile in high-dose group of overweight/obese participants with age > 40 yrs, BMI  $\leq$  29.9 (n = 6)

|                    | <b>Before</b> | <b>After</b> | <b><i>p</i> value<sup>a</sup></b> |
|--------------------|---------------|--------------|-----------------------------------|
| <b>TC, mmol/L</b>  | 5.37          | 5.53         | 0.27                              |
| <b>TG, mmol/L</b>  | 1.51          | 1.57         | 0.41                              |
| <b>HDL, mmol/L</b> | 1.22          | 1.30         | 0.08                              |
| <b>LDL, mmol/L</b> | 3.47          | 3.46         | 0.49                              |

<sup>a</sup>Within-group differences in the parameters before and after intervention were compared using paired t-test (parametric)

**Supplementary Table S8:** Lipid profile in high-dose group of overweight/obese participants with age > 40 yrs, BMI  $\geq$  30.0 (n = 13)

|                    | <b>Before</b> | <b>After</b> | <b><i>p</i> value<sup>a</sup></b> |
|--------------------|---------------|--------------|-----------------------------------|
| <b>TC, mmol/L</b>  | 5.30          | 5.22         | 0.26                              |
| <b>TG, mmol/L</b>  | 1.39          | 1.26         | 0.028                             |
| <b>HDL, mmol/L</b> | 1.39          | 1.55         | 0.005                             |
| <b>LDL, mmol/L</b> | 3.28          | 3.09         | 0.082                             |

<sup>a</sup>Within-group differences in the parameters before and after intervention were compared using paired t-test (parametric)
